# Supplementary material for: Crosstalk between Virulence Loci: Regulation of Salmonella enterica Pathogenicity Island 1 (SPI-1) by Products of the std Fimbrial Operon
Source: PLoS One. 2012 Jan 23;7(1):e30499. doi: 10.1371/journal.pone.0030499 (PMC3264584; doi:10.1371/journal.pone.0030499)
Supplement: Table S1 — Strain list. (DOC) [file pone.0030499.s006.doc]

**Table S1. Strain list**

| Strain designation | Genotype or description | Reference or source |
| --- | --- | --- |
| ATCC 14028 | Wild type | ATCC |
| SV5264 | *dam-231* | [39] |
| SV5284 | (*hilA’-lacZ*+)(Hyb) | [39] |
| SV5297 | (*invF’-lacZ*+)(Hyb) | [39] |
| SV5298 | *dam-231* (*invF’-lacZ*+)(Hyb) | [39] |
| SV5382 | (*sipB’-lacZ*+)(Hyb) | [39] |
| SV5383 | *dam-231* (*sipB’-lacZ*+)(Hyb) | [39] |
| SV5457 | *invF*::3xFLAG | [39] |
| SV5456 | *hilA*::3xFLAG | [39] |
| SV5459 | *sipB*::3xFLAG | This study |
| SV6062 | *∆SPI-1* | F. Baisón |
| SV6410 | (*hilD-lacZ1*) | This study |
| SV6413 | (*hilD-lacZ930*) | This study |
| SV6473 | *std* (*invF’-lacZ*+)(Hyb) | This study |
| SV6474 | *std* *dam-231* (*invF’-lacZ*+)(Hyb) | This study |
| SV6475 | *std* (*sipB’-lacZ*+)(Hyb) | This study |
| SV6476 | *std* *dam-231* (*sipB’-lacZ*+)(Hyb) | This study |
| SV6477 | *stdA* (*invF’-lacZ*+)(Hyb) | This study |
| SV6478 | *stdA* *dam-231* (*invF’-lacZ*+)(Hyb) | This study |
| SV6479 | *stdB* (*invF’-lacZ*+)(Hyb) | This study |
| SV6480 | *stdB* *dam-231* (*invF’-lacZ*+)(Hyb) | This study |
| SV6481 | *stdC* (*invF’-lacZ*+)(Hyb) | This study |
| SV6482 | *stdC* *dam-231* (*invF’-lacZ*+)(Hyb) | This study |
| SV6483 | *stdD* (*invF’-lacZ*+)(Hyb) | This study |
| SV6484 | *stdD* *dam-231* (*invF’-lacZ*+)(Hyb) | This study |
| SV6485 | *stdE* (*invF’-lacZ*+)(Hyb) | This study |
| SV6486 | *stdE* *dam-231* (*invF’-lacZ*+)(Hyb) | This study |
| SV6487 | *stdF* (*invF’-lacZ*+)(Hyb) | This study |
| SV6488 | *stdF* *dam-231* (*invF’-lacZ*+)(Hyb) | This study |
| SV6501 | *stdF*::3xFLAG | This study |
| SV6502 | *dam-231 stdF*::3xFLAG | This study |
| SV6503 | PL*tetO*-*stdEF* | This study |
| SV6504 | PL*tetO*-*stdF* | This study |
| SV6506 | PL*tetO*-*stdEF* *stdE* | This study |
| SV6508 | PL*tetO*-*stdEF* *stdF* | This study |
| SV6509 | PL*tetO*-*stdE*::3xFLAG | This study |
| SV6510 | PL*tetO*-*stdEF*::3xFLAG | This study |
| SV6511 | PL*tetO*-*stdEF* (*invF’-lacZ*+)(Hyb) | This study |
| SV6512 | PL*tetO*-*stdEF* (*sipB’-lacZ*+)(Hyb) | This study |
| SV6513 | PL*tetO*-*stdEF* (*hilA’-lacZ*+)(Hyb) | This study |
| SV6515 | PL*tetO*-*stdEF* (*hilD-lacZ1*) | This study |
| SV6517 | PL*tetO*-*stdF* (*invF’-lacZ*+)(Hyb) | This study |
| SV6518 | PL*tetO*-*stdF* (*sipB’-lacZ*+)(Hyb) | This study |
| SV6519 | PL*tetO*-*stdF* (*hilA’-lacZ*+)(Hyb) | This study |
| SV6521 | PL*tetO*-*stdF* (*hilD-lacZ1*) | This study |
| SV6524 | (*hilD-lacZ1*)/pBR328 | This study |
| SV6525 | (*hilD-lacZ1*)/pBR328-*rtsA* | This study |
| SV6530 | (*stdD’-lacZ*+)(Hyb) | This study |
| SV6531 | *dam-231* (*stdD’-lacZ*+)(Hyb) | This study |
| SV6532 | (*stdE’-lacZ*+)(Hyb) | This study |
| SV6533 | *dam-231* (*stdE’-lacZ*+)(Hyb) | This study |
| SV6534 | (*stdF’-lacZ*+)(Hyb) | This study |
| SV6535 | *dam-231* (*stdF’-lacZ*+)(Hyb) | This study |
| SV6634 | PL*tetO*-*stdEF* *stdEF* | This study |
| SV6635 | PL*tetO*-*stdF* *stdF* | This study |
| SV6662 | *stdD*::3xFLAG | This study |
| SV6663 | *dam-231 stdD*::3xFLAG | This study |
| SV6664 | PL*tetO*-*stdF*::3xFLAG | This study |
| SV6748 | *stdE*::3xFLAG | This study |
| SV6749 | *dam-231 stdE*::3xFLAG | This study |
| SV6750 | PL*tetO*-*stdEF* *stdE* (*hilA’-lacZ*+)(Hyb) | This study |
| SV6751 | PL*tetO*-*stdEF* *stdF* (*hilA’-lacZ*+)(Hyb) | This study |
| SV6752 | PL*tetO*-*stdEF* *stdEF* (*hilA’-lacZ*+)(Hyb) | This study |
| SV6753 | PL*tetO*-*stdF* *stdF* (*hilA’-lacZ*+)(Hyb) | This study |
| SV6754 | PL*tetO*-*stdEF* *stdE* (*sipB’-lacZ*+)(Hyb) | This study |
| SV6755 | PL*tetO*-*stdEF* *stdF* (*sipB’-lacZ*+)(Hyb) | This study |
| SV6756 | PL*tetO*-*stdEF* *stdEF* (*sipB’-lacZ*+)(Hyb) | This study |
| SV6757 | PL*tetO*-*stdF* *stdF* (*sipB’-lacZ*+)(Hyb) | This study |
| SV6758 | PL*tetO*-*stdEF* *stdE* (*invF’-lacZ*+)(Hyb) | This study |
| SV6759 | PL*tetO*-*stdEF* *stdF* (*invF’-lacZ*+)(Hyb) | This study |
| SV6760 | PL*tetO*-*stdEF* *stdEF* (*invF’-lacZ*+)(Hyb) | This study |
| SV6761 | PL*tetO*-*stdF* *stdF* (*invF’-lacZ*+)(Hyb) | This study |
| SV6762 | PL*tetO*-*stdEF hilA*::3xFLAG | This study |
| SV6763 | PL*tetO*-*stdEF* *stdE hilA*::3xFLAG | This study |
| SV6764 | PL*tetO*-*stdEF* *stdF hilA*::3xFLAG | This study |
| SV6765 | PL*tetO*-*stdEF* *stdEF hilA*::3xFLAG | This study |
| SV6766 | PL*tetO*-*stdF hilA*::3xFLAG | This study |
| SV6767 | PL*tetO*-*stdF* *stdF hilA*::3xFLAG | This study |
| SV6768 | PL*tetO*-*stdEF sipB*::3xFLAG | This study |
| SV6769 | PL*tetO*-*stdEF* *stdE sipB*::3xFLAG | This study |
| SV6770 | PL*tetO*-*stdEF* *stdF sipB*::3xFLAG | This study |
| SV6771 | PL*tetO*-*stdEF* *stdEF sipB*::3xFLAG | This study |
| SV6772 | PL*tetO*-*stdF sipB*::3xFLAG | This study |
| SV6773 | PL*tetO*-*stdF* *stdF sipB*::3xFLAG | This study |
| SV6774 | PL*tetO*-*stdEF invF*::3xFLAG | This study |
| SV6775 | PL*tetO*-*stdEF* *stdE invF*::3xFLAG | This study |
| SV6776 | PL*tetO*-*stdEF* *stdF invF*::3xFLAG | This study |
| SV6777 | PL*tetO*-*stdEF* *stdEF invF*::3xFLAG | This study |
| SV6778 | PL*tetO*-*stdF invF*::3xFLAG | This study |
| SV6779 | PL*tetO*-*stdF* *stdF invF*::3xFLAG | This study |
| SV6780 | PL*tetO*-*stdEF* *stdEF* (*hilD-lacZ1*) | This study |
| SV6781 | PL*tetO*-*stdF* *stdF* (*hilD-lacZ1*) | This study |
| SV6788 | *dam-231* (*hilD-lacZ930*) | This study |
| SV6901 | PL*tetO*-*stdEF* *stdEF trg*::Mu*d*J | This study |
| TR5878 | *galE496* r(LT2)– m(LT2)– r(S)+ *ilv-542 metA22 trpB2* Fels2– *fliA66 strA120* *xyl-404 metE551 hspL56 hspS29* | J. R. Roth |
